# Supplementary material for: Measuring poverty in America: How politics has trumped reason, and how to restore it
Source: Atypon-hosted journal article supplement (doi:10.1056/nejmoa0911341), 2012-01-01
Supplement: nejm_lo_1772sa1.pdf [file nejm_lo_1772sa1.pdf]

## Supplementary Appendix

This appendix has been provided by the authors to give readers additional information about their work.

Supplement to: Lo AC, Guarino PD, Richards LG, et al. Robot-assisted therapy for long-term upper-limb impairment after stroke. *N Engl J Med* 2010;362:1772-83. DOI: 10.1056/NEJMoa0911341.

**Table S1: Reasons for Exclusion of Screened Patients**

---

| Exclusion —no. (% of reasons)*                                                           |         |
|------------------------------------------------------------------------------------------|---------|
| Fugl-Meyer scores < 7 or > 38                                                            | 57 (78) |
| Unable to complete trial due to medical condition,<br>transportation, or other problems, | 11 (15) |
| Joint pain or deformity that would interfere with therapy                                | 9 (12)  |
| Stroke not identified on CT Scan or MRI                                                  | 4 (5)   |
| Insufficient cognitive function                                                          | 4 (5)   |
| Informed consent withdrawn (refusal)                                                     | 3 (4)   |
| Pre-existing bone disease or joint injury                                                | 1 (1)   |
| Enrolled/plan to enroll in competing study                                               | 1 (1)   |
| Total patients rejected                                                                  | 73      |

---

\* Patients may have more than one exclusion reason recorded.
